# Supplementary material for: EuSn2As2: an exfoliatable magnetic layered Zintl–Klemm phase
Source: Royal Society of Chemistry journal article supplement (doi:10.1039/c6qi00476h), 2016-12-26
Supplement: c6qi00476h1.pdf [file c6qi00476h1.pdf]

## Supporting Information

### **EuSn<sub>2</sub>As<sub>2</sub>: An Exfoliatable Magnetic Layered Zintl-Klemm Phase**

M. Q. Arguilla, N. D. Cultrara, Z. J. Baum, S. Jiang, R. D. Ross and J. E. Goldberger\*

<sup>1</sup>Department of Chemistry and Biochemistry, The Ohio State University, Columbus, Ohio 43210-1340,

United States

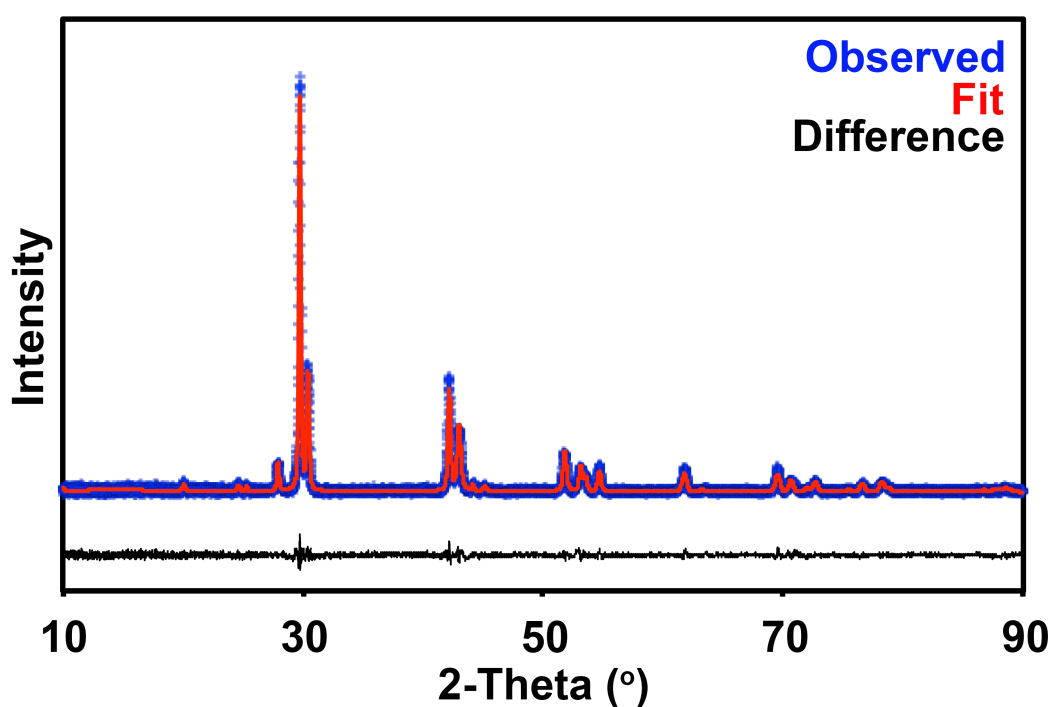

**Figure S1.** Powder XRD Rietveld refinement results for EuSn<sub>2</sub>As<sub>2</sub> using TOPAS.

**Table S1.** Selected bond lengths based on the refined EuSn<sub>2</sub>As<sub>2</sub> structure.

|            | <b>Bond Length (Å)</b> |
|------------|------------------------|
| Sn-As (3x) | 2.7761(3)              |
| Eu-As (6x) | 3.1019(4)              |

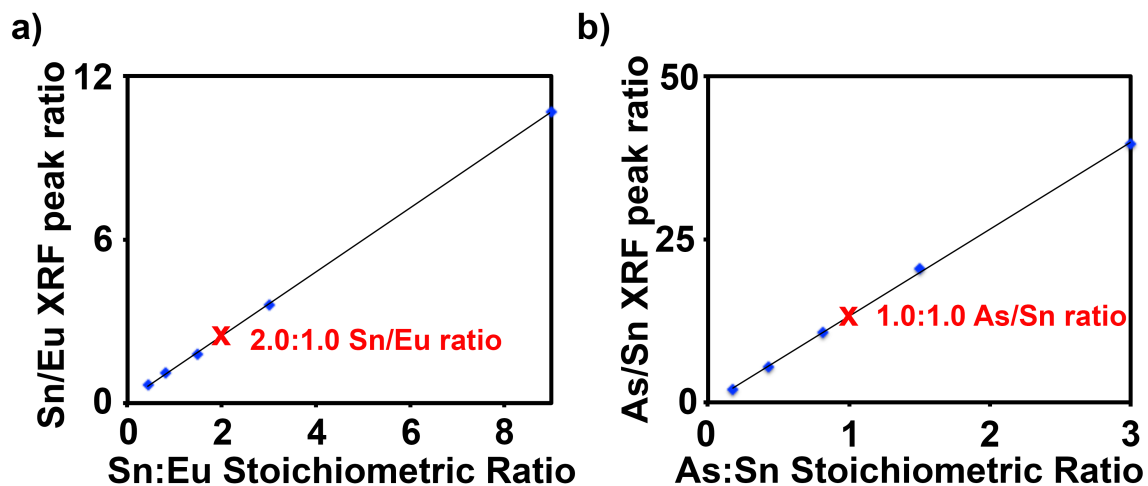

**Figure S2.** X-Ray Fluorescence verification of the Eu:Sn and Sn:As stoichiometry in EuSn<sub>2</sub>As<sub>2</sub>. Different ratios of Eu<sub>2</sub>O<sub>3</sub> and elemental Sn (Eu:Sn) and elemental Sn and As (Sn:As) were used to prepare a standard calibration curve.

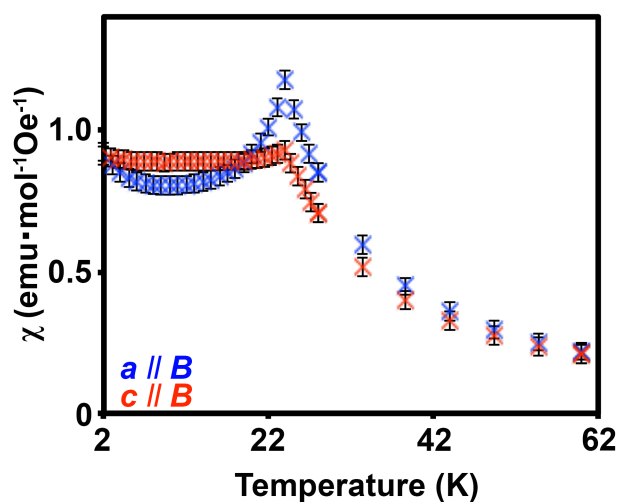

**Figure S3.** Field-cooled temperature-dependent magnetic susceptibility of EuSn<sub>2</sub>As<sub>2</sub> with the  $a/b$ -axis (blue) and  $c$ -axis (red) parallel to the field showing the standard deviation.

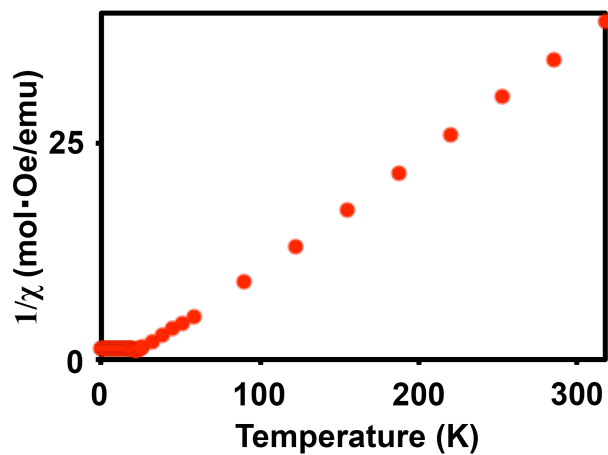

**Figure S4.** Curie-Weiss fit corresponding to the ZFC inverse susceptibility of the  $\text{EuSn}_2\text{As}_2$  crystal with its  $c$ -axis oriented parallel to the applied 0.01 T field.

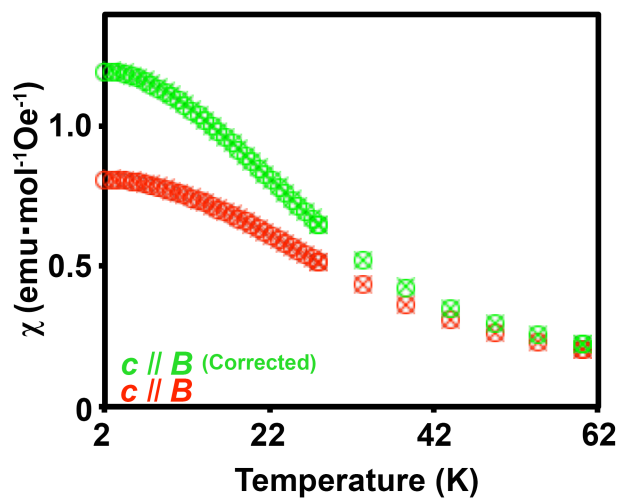

**Figure S5.** Temperature-dependent magnetic susceptibility of  $\text{EuSn}_2\text{As}_2$  with the  $c$ -axis parallel to the applied field of 5T.

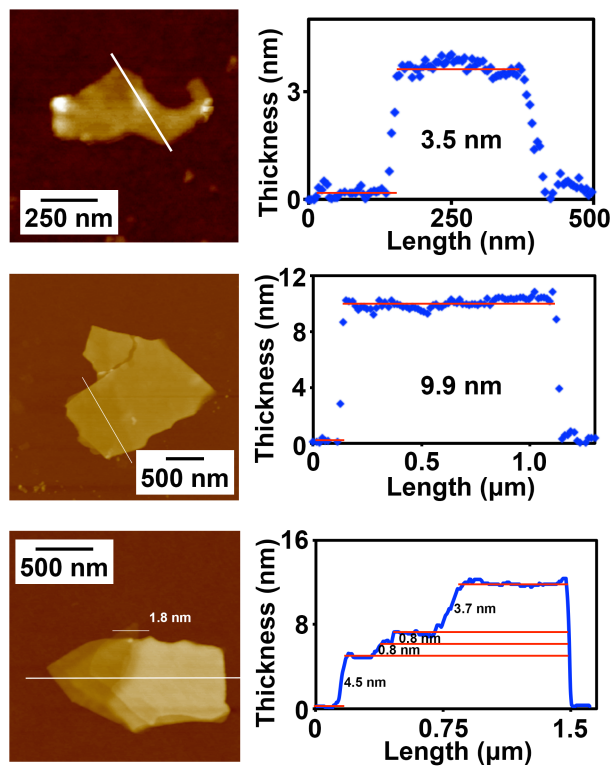

**Figure S6.** AFM images and height profiles of mechanically-exfoliated  $\text{EuSn}_2\text{As}_2$  onto  $285\text{ nm SiO}_2/\text{Si}$ .
